# Supplementary material for: Radiomics-Based Classification of Left Ventricular Non-compaction, Hypertrophic Cardiomyopathy, and Dilated Cardiomyopathy in Cardiovascular Magnetic Resonance
Source: PubMed Central journal article supplement (PMC8586199; doi:10.3389/fcvm.2021.764312), 2021-10-29
Supplement: Data_Sheet_1.pdf [file Data_Sheet_1.pdf]

## 2 *Supplementary Material*

### 1 SUPPLEMENTARY TABLES

**Table S1.** Hyper-parameters grid for optimization.

| <b>Model</b>        | <b>Hyper-parameter: [range]</b>                                                                                                                                  |
|---------------------|------------------------------------------------------------------------------------------------------------------------------------------------------------------|
| One-vs-Rest SVM     | C: [0.01,1,10,100,1000]<br>gamma: [1,0.1,0.001,0.0001]<br>kernel = ['rbf']                                                                                       |
| Random Forest       | bootstrap: ['True','False']<br>min_samples_leaf: [3, 4, 5, 6]<br>n_estimators: [100, 200, 300, 500, 1000]<br>min_samples_split: [8, 10, 12]<br>multi_class='ovr' |
| Logistic Regression | penalty: [l1]<br>Solver: ['liblinear']<br>multiclass = ['ovr']<br>max_iter = [100,150]                                                                           |
| Select KBest        | k: [5,10,15,20,25,30,40,50,60,70,80,90,100,110,120]                                                                                                              |

C: regularization parameter. RBF: Radial Basis Function kernel. OVR: One-vs-Rest.

**Table S2.** Full list of radiomics selected. This is an approximate listing, numbers may vary according to the figure 3

| Radiomics                            | Type        | Region | Phase | Weight |
|--------------------------------------|-------------|--------|-------|--------|
| Sphericity                           | Shape       | LVMYO  | ES    | 4.9    |
| Long Run High Gray Level Emphasis    | GLRLM       | LV     | ES    | 4.6    |
| Sphericity                           | Shape       | LVMYO  | ED    | 3.6    |
| Surface Area to Volume Ratio         | Shape       | LVMYO  | ES    | 3.6    |
| Gray Level Non Uniformity            | GLSZM       | LV     | ES    | 3.4    |
| Minimum                              | First Order | LVMYO  | ED    | 3.4    |
| Least Axis                           | Shape       | LV     | ED    | 2.5    |
| Large Area Low Gray Level Emphasis   | GLSZM       | LVMYO  | ES    | 3.0    |
| Volume                               | Shape       | LV     | ED    | 2.9    |
| Coarseness                           | NGTDM       | LV     | ES    | 2.2    |
| Skewness                             | First Order | LV     | ES    | 2.8    |
| Inverse Variance                     | GLCM        | LVMYO  | ES    | 2.8    |
| Skewness                             | First Order | LVMYO  | ES    | 2.6    |
| Surface Area to Volume Ratio         | Shape       | LV     | ED    | 2.6    |
| Percentile90                         | First Order | LVMYO  | ED    | 2.6    |
| Contrast                             | NGTDM       | LV     | ES    | 2.5    |
| Large Area High Gray Level Emphasis  | GLSZM       | LVMYO  | ED    | 2.4    |
| Low Gray Level Run Emphasis          | GLRLM       | LVMYO  | ED    | 2.4    |
| Long Run High Gray Level Emphasis    | GLRLM       | LV     | ED    | 2.4    |
| Minimum                              | First Order | LV     | ED    | 2.4    |
| Cluster Shade                        | GLCM        | LV     | ES    | 2.3    |
| Max 2Ddiameter Slice                 | Shape       | LV     | ED    | 2.2    |
| Entropy                              | First Order | LVMYO  | ED    | 2.2    |
| Large Area Emphasis                  | GLSZM       | LVMYO  | ED    | 2.2    |
| Large Area High Gray Level Emphasis  | GLSZM       | LV     | ES    | 2.0    |
| Minimum                              | First Order | LV     | ES    | 2.0    |
| Percentile10                         | First Order | LVMYO  | ES    | 2.0    |
| Large Area High Gray Level Emphasis  | GLSZM       | LVMYO  | ES    | 2.0    |
| Inverse Difference Moment Normalized | GLCM        | LVMYO  | ED    | 2.0    |
| Surface Area to Volume Ratio         | Shape       | LVMYO  | ED    | 2.0    |
| Entropy                              | First Order | LVMYO  | ES    | 2.0    |
| Large Area Emphasis                  | GLSZM       | LVMYO  | ES    | 2.0    |
| Elongation                           | Shape       | LV     | ES    | 2.0    |
| Large Area Low Gray Level Emphasis   | GLSZM       | LVMYO  | ED    | 2.0    |
| Max 3Ddiameter                       | Shape       | LV     | ES    | 2.0    |
| Zone Entropy                         | GLSZM       | LVMYO  | ES    | 1.8    |
| Long Run High Gray Level Emphasis    | GLRLM       | LVMYO  | ED    | 1.8    |
| Low Gray Level Zone Emphasis         | GLSZM       | LVMYO  | ES    | 1.8    |
| Informal Measure of Correlation1     | GLCM        | LVMYO  | ED    | 1.8    |
| Least Axis                           | Shape       | LVMYO  | ED    | 1.8    |

**Table S3.** Full list of radiomics extracted. Note that for each radiomic feature, we obtain double (LV, LVMYO) and double (ED,ES). Therefore, only 105 are listed, a total of 420 (105x4) were extracted.

| Type                                 | Radiomics                                 |       |
|--------------------------------------|-------------------------------------------|-------|
| Shape                                | Volume                                    | GLSZM |
|                                      | Surface Area                              |       |
|                                      | Surface Area to Volume Ratio              |       |
|                                      | Sphericity                                |       |
|                                      | Max3D diameter                            |       |
|                                      | Max2D diameter Slice                      |       |
|                                      | Max2D diameter Column                     |       |
|                                      | Max2D diameter Row                        |       |
|                                      | Major Axis                                |       |
|                                      | Minor Axis                                |       |
|                                      | Least Axis                                |       |
|                                      | Elongation                                |       |
|                                      | Flatness                                  |       |
| First Order                          | Energy                                    | GLRLM |
|                                      | Total Energy                              |       |
|                                      | Entropy                                   |       |
|                                      | Minimum                                   |       |
|                                      | Percentile 10                             |       |
|                                      | Percentile 90                             |       |
|                                      | Maximum                                   |       |
|                                      | Mean                                      |       |
|                                      | Median                                    |       |
|                                      | Interquartile Range                       |       |
|                                      | Mean Absolute Deviation                   |       |
|                                      | Robust Mean Absolute Deviation            |       |
|                                      | Root Mean Squared                         |       |
|                                      | Skewness                                  |       |
|                                      | Kurtosis                                  |       |
|                                      | Variance                                  |       |
| Uniformity                           |                                           |       |
| GLCM                                 | Autocorrelation                           | NGTDM |
|                                      | Joint Average                             |       |
|                                      | Cluster Prominence                        |       |
|                                      | Cluster Shade                             |       |
|                                      | Cluster Tendency                          | GLDM  |
|                                      | Contrast                                  |       |
|                                      | Correlation                               |       |
|                                      | Difference Average                        |       |
|                                      | Difference Entropy                        | GLDM  |
|                                      | Difference Variance                       |       |
|                                      | Joint Energy                              |       |
|                                      | Joint Entropy                             |       |
|                                      | Informal Measure of Correlation1          |       |
|                                      | Informal Measure of Correlation2          |       |
|                                      | Inverse Difference                        |       |
|                                      | Inverse Difference Normalized             |       |
|                                      | Inverse Variance                          |       |
|                                      | Maximum Probability                       |       |
|                                      | Sum Average                               |       |
|                                      | Sum Entropy                               |       |
| Sum of Squares                       |                                           |       |
| Inverse Difference Moment            |                                           |       |
| Inverse Difference Moment Normalized |                                           |       |
|                                      | Small Area Emphasis                       |       |
|                                      | Large Area Emphasis                       |       |
|                                      | Gray Level Non Uniformity                 |       |
|                                      | Gray Level Non Uniformity Normalized      |       |
|                                      | Size Zone Non Uniformity                  |       |
|                                      | Size Zone Non Uniformity Normalized       |       |
|                                      | Zone Percentage                           |       |
|                                      | Gray Level Variance                       |       |
|                                      | Zone Variance                             |       |
|                                      | Zone Entropy                              |       |
|                                      | Low Gray Level Zone Emphasis              |       |
|                                      | High Gray Level Zone Emphasis             |       |
|                                      | Small Area Low Gray Level Emphasis        |       |
|                                      | Small Area High Gray Level Emphasis       |       |
|                                      | Large Area Low Gray Level Emphasis        |       |
|                                      | Large Area High Gray Level Emphasis       |       |
|                                      | Short Run Emphasis                        |       |
|                                      | Long Run Emphasis                         |       |
|                                      | Gray Level Non Uniformity                 |       |
|                                      | Gray Level Non Uniformity Normalized      |       |
|                                      | Run Length Non Uniformity                 |       |
|                                      | Run Length Non Uniformity Normalized      |       |
|                                      | Run Percentage                            |       |
|                                      | Gray Level Variance                       |       |
|                                      | Run Variance                              |       |
|                                      | Run Entropy                               |       |
|                                      | Low Gray Level Run Emphasis               |       |
|                                      | High Gray Level Run Emphasis              |       |
|                                      | Short Run Low Gray Level Emphasis         |       |
|                                      | Short Run High Gray Level Emphasis        |       |
|                                      | Long Run Low Gray Level Emphasis          |       |
|                                      | Long Run High Gray Level Emphasis         |       |
|                                      | Coarseness                                |       |
|                                      | Contrast                                  |       |
|                                      | Busyness                                  |       |
|                                      | Complexity                                |       |
|                                      | Strength                                  |       |
|                                      | Small Dependence Emphasis                 |       |
|                                      | Large Dependence Emphasis                 |       |
|                                      | Gray Level Non Uniformity                 |       |
|                                      | Dependence Non Uniformity                 |       |
|                                      | Dependence Non Uniformity Normalized      |       |
|                                      | Gray Level Variance                       |       |
|                                      | Dependence Variance                       |       |
|                                      | Dependence Entropy                        |       |
|                                      | Low Gray Level Emphasis                   |       |
|                                      | High Gray Level Emphasis                  |       |
|                                      | Small Dependence Low Gray Level Emphasis  |       |
|                                      | Small Dependence High Gray Level Emphasis |       |
|                                      | Large Dependence Low Gray Level Emphasis  |       |
|                                      | Large Dependence High Gray Level Emphasis |       |
